# Supplementary material
Source: PubMed Central journal article supplement (PMC3840278)
Supplement: tableS1.pdf [file tableS1.pdf]

Table S1: Proteins identified by mass spectrometry

| <b>Accession</b> | <b>Name</b>                                           |
|------------------|-------------------------------------------------------|
| spt P07724       | Serum albumin precursor                               |
| spt O35744       | Chitinase 3-like protein 3 precursor                  |
| spt Q92111       | Serotransferrin precursor                             |
| spt P08074       | Lung carbonyl reductase [NADPH]                       |
| spt P08228       | Superoxide dismutase [Cu-Zn]                          |
| spt Q91X72       | Hemopexin precursor                                   |
| dbj BAB22019.1   | unnamed protein product                               |
| spt Q06318       | Uteroglobin precursor                                 |
| spt P20152       | Vimentin                                              |
| trm Q5SQ27       | Novel protein, ortholog of human and rat SEC14-like 3 |
| trm Q91X87       | Selenium binding protein 1                            |
| spt P62204       | Calmodulin                                            |
| spt P17742       | Peptidyl-prolyl cis-trans isomerase A                 |
| spt P24549       | Aldehyde dehydrogenase 1A1                            |
| spt P31725       | Calgranulin B                                         |
| spt Q61233       | L-plastin                                             |
| trm Q922C8       | Prolyl 4-hydroxylase, beta polypeptide                |
| trm O35444       | RAGE                                                  |
| trm Q80XP1       | Complement component 3                                |
| spt P10649       | Glutathione S-transferase Mu 1                        |
| trm Q6A0D0       | MKIAA0106 protein                                     |
| spt Q64727       | Vinculin                                              |
| spt P27005       | Calgranulin A                                         |
| spt Q61646       | Haptoglobin precursor                                 |
| spt P15626       | Glutathione S-transferase Mu 2                        |
| trm Q6P5D0       | Dihydropyrimidinase-like 2                            |
| trm Q6P5C8       | Hypothetical protein                                  |
| cra mCP1884.2    | catalase                                              |
| trm Q6S9I1       | HMW kininogen-I variant                               |
| spt P70296       | Phosphatidylethanolamine-binding protein              |
| spt Q9Z1Q5       | Chloride intracellular channel protein 1              |
| trm Q9EQK1       | NADP+-specific isocitrate dehydrogenase               |
| trm Q91VU2       | Transgelin 2                                          |
| spt Q9Z0J0       | Epididymal secretory protein E1 precursor             |
| trm Q99K47       | Fibrinogen, alpha polypeptide                         |
| trm Q99JZ6       | Tubulin, beta, 2                                      |
| trm Q99LF6       | Glucose regulated protein                             |
| spt P19157       | Glutathione S-transferase P 1                         |
| spt P16045       | Galectin-1                                            |
| trm Q80TM2       | MKIAA1027 protein                                     |

|                |                                                           |
|----------------|-----------------------------------------------------------|
| trm O88592     | Extracellular superoxide dismutase                        |
| spt Q8VCT4     | Carboxylesterase 3 precursor                              |
| spt P63260     | Actin, cytoplasmic 2                                      |
| trm Q80Y52     | Heat shock protein 1, alpha                               |
| trm Q66JP1     | Ubiquitin A-52 residue ribosomal protein fusion product 1 |
| spt Q9D1A2     | Cytosolic nonspecific dipeptidase                         |
| spt Q9CZ44     | NSFL1 cofactor p47                                        |
| cra mCP99342   | tropomyosin 1, alpha                                      |
| spt P97371     | Proteasome activator complex subunit 1                    |
| trm Q8R3T1     | Glyoxalase 1                                              |
| trm Q91VG9     | Transglutaminase 2, C polypeptide                         |
| trm Q6NVF7     | Prx protein                                               |
| trm Q8CI65     | Atp5b protein                                             |
| spt P14211     | Calreticulin precursor                                    |
| trm Q64513     | Triosephosphate isomerase                                 |
| trm Q810V3     | Electron transferring flavoprotein, beta polypeptide      |
| spt Q05816     | Fatty acid-binding protein, epidermal                     |
| trm Q99M14     | Ctss protein                                              |
| spt Q99LX0     | DJ-1 protein                                              |
| rf XP_486211.1 | similar to Translationally controlled tumor protein       |
| spt Q02053     | Ubiquitin-activating enzyme E1 1                          |
| trm Q99LA1     | Anxa5 protein                                             |
| spt Q01768     | Nucleoside diphosphate kinase B                           |
| spt Q9QUI0     | Transforming protein RhoA                                 |
| spt P47738     | Aldehyde dehydrogenase, mitochondrial precursor           |
| spt O09131     | Glutathione transferase omega 1                           |
| trm Q91V38     | Tumor rejection antigen gp96                              |
| spt P50543     | Calgizzarin                                               |
| trm Q8CDN6     | Mus musculus adult male testis cDNA                       |
| spt P08905     | Lysozyme C, type M precursor                              |
| spt P26883     | FK506-binding protein 1A                                  |
| trm Q8R1M2     | E130307C13 protein                                        |
| trm Q5RJH8     | Glutathione peroxidase 1                                  |
| trm Q9CXX3     | Mus musculus 14, 17 days embryo head cDNA                 |
| spt Q60668     | Heterogeneous nuclear ribonucleoprotein D0                |
| spt P70349     | Histidine triad nucleotide-binding protein 1              |
| trm Q5XJE7     | Pgk1 protein                                              |
| trm Q9CWJ4     | Mus musculus ES cells cDNA,                               |
| trm Q9D859     | Mus musculus adult male small intestine cDNA,             |
| spt P45376     | Aldose reductase                                          |
| cra mCP111686  | NRAA Best Hit: C88346 protein F42G4.3a                    |
| spt P04247     | Myoglobin                                                 |
| spt Q9R0P5     | Destrin                                                   |

|                |                                                     |
|----------------|-----------------------------------------------------|
| trm Q8VCM7     | Fibrinogen, gamma polypeptide                       |
| rf NP_032257.2 | hepatoma-derived growth factor                      |
| emb CAA37782.1 | unnamed protein product                             |
| trm Q9DCV7     | Mus musculus adult male kidney cDNA,                |
| spt P10107     | Annexin A1                                          |
| spt Q03265     | ATP synthase alpha chain, mitochondrial precursor   |
| spt P31786     | Acyl-CoA-binding protein                            |
| trm Q9CY42     | Mus musculus 13 days embryo liver cDNA,             |
| cra mCP99343   | tropomyosin 1, alpha                                |
| trm Q8R1P0     | Malate dehydrogenase 2, NAD                         |
| spt P26350     | Prothymosin alpha                                   |
| spt P05064     | Fructose-bisphosphate aldolase A                    |
| spt P97315     | Cysteine and glycine-rich protein 1                 |
| spt Q8BHL4     | Retinoic acid induced 3 protein                     |
| trm Q8K0E8     | Fibrinogen, B beta polypeptide                      |
| trm Q91ZR9     | Heterogeneous nuclear ribonucleoprotein A2/B1       |
| trm Q6NWW8     | Complement component 4                              |
| trm Q9DBN7     | Mus musculus adult male liver cDNA,                 |
| spt P61161     | Actin-like protein 2                                |
| spt P10639     | Thioredoxin                                         |
| spt Q9QUH0     | Glutaredoxin                                        |
| spt O35639     | Annexin A3                                          |
| trm Q91XH5     | Sepiapterin reductase                               |
| trm Q9R069     | Lutheran glycoprotein                               |
| trm Q61344     | Beta-tropomyosin                                    |
| spt O89053     | Coronin-1A                                          |
| trm Q8BPH1     | Mus musculus 10 days embryo whole body cDNA,        |
| trm Q9JK98     | Sulfated glycoprotein-2 isoform 2                   |
| spt P18242     | Cathepsin D precursor                               |
| spt P34884     | Macrophage migration inhibitory factor              |
| spt Q9JKF1     | Ras GTPase-activating-like protein IQGAP1           |
| trm Q8BSS4     | Mus musculus 8 days embryo whole body cDNA,         |
| trm Q5XKE1     | Eno1 protein                                        |
| trm Q8VD79     | H-caldesmon                                         |
| trm Q80XJ7     | Aldo-keto reductase family 1, member A4             |
| spt P05202     | Aspartate aminotransferase, mitochondrial precursor |
| trm Q9WTQ5     | PKC binding protein SSeCKS                          |
| trm Q9CPX4     | Mus musculus 10 days embryo whole body cDNA,        |
| trm Q8VC41     | Serpina1d protein                                   |
| gb AAH33451.1  | Igh-4 protein                                       |
| spt Q61207     | Sulfated glycoprotein 1 precursor                   |
| spt Q9QYB1     | Chloride intracellular channel protein 4            |

|                |                                                                                         |
|----------------|-----------------------------------------------------------------------------------------|
| spt P70441     | Ezrin-radixin-moesin binding phosphoprotein 50                                          |
| spt P62897     | Cytochrome c, somatic                                                                   |
| spt P14152     | Malate dehydrogenase, cytoplasmic                                                       |
| trm Q9CSP8     | Mus musculus 11 days embryo whole body cDNA,                                            |
| trm Q810K5     | Nsep1 protein                                                                           |
| trm Q8CBA0     | Mus musculus adult male bone cDNA,                                                      |
| trm Q91VD2     | Vasodilator-stimulated phosphoprotein                                                   |
| spt Q00519     | Xanthine dehydrogenase/oxidase                                                          |
| spt Q9CR86     | Calcium-regulated heat stable protein 1                                                 |
| trm Q99LB4     | Capg protein                                                                            |
| spt P56395     | Cytochrome b5                                                                           |
| spt O88844     | Isocitrate dehydrogenase [NADP] cytoplasmic                                             |
| spt Q93092     | Transaldolase                                                                           |
| trm Q6NZD0     | Heat shock protein 8                                                                    |
| trm Q7TMX2     | Alpha isoform of regulatory subunit A, protein phosphatase 2                            |
| spt P14602     | Heat-shock protein beta-1                                                               |
| trm Q8BPD5     | Mus musculus 18 days pregnant adult female placenta and extra<br>embryonic tissue cDNA, |
| spt P99024     | Tubulin beta-5 chain                                                                    |
| spt P63242     | Eukaryotic translation initiation factor 5A                                             |
| cra mCP108421  | hypothetical protein                                                                    |
| spt P26040     | Ezrin                                                                                   |
| rf NP_032550.1 | lumican                                                                                 |
| rf NP_033067.1 | radixin                                                                                 |
| trm Q6UL10     | AHNAK                                                                                   |
| spt P20065     | Thymosin beta-4                                                                         |
| trm Q6NWV5     | Pgam1 protein                                                                           |
| trm Q62257     | Conraspin precursor                                                                     |
| trm O08692     | Myeloid batenecin                                                                       |
| trm Q99K93     | Pdlim1 protein                                                                          |
| spt P29699     | Alpha-2-HS-glycoprotein precursor                                                       |
| spt P40142     | Transketolase                                                                           |
| spt P26041     | Moesin                                                                                  |
| spt P52196     | Thiosulfate sulfurtransferase                                                           |
| trm Q9DAB4     | Mus musculus adult male testis cDNA,                                                    |
| spt P58252     | Elongation factor 2                                                                     |
| spt P40936     | Thioether S-methyltransferase                                                           |
| spt Q61599     | Rho GDP-dissociation inhibitor 2                                                        |
| spt P37804     | Transgelin                                                                              |
| spt Q99PT1     | Rho GDP-dissociation inhibitor 1                                                        |
| trm Q8C253     | Mus musculus NOD-derived CD11c +ve dendritic cells cDNA,                                |
| trm Q8VEK3     | Heterogenous nuclear ribonucleoprotein U                                                |
| trm Q9D9F5     | Mus musculus adult male testis cDNA,                                                    |

|                |                                                             |
|----------------|-------------------------------------------------------------|
| trm Q9CW12     | Mus musculus ES cells cDNA,                                 |
| trm Q9DCS7     | Mus musculus adult male kidney cDNA,                        |
| trm Q9DBN0     | Mus musculus adult male liver cDNA,                         |
| spt P32020     | Nonspecific lipid-transfer protein, mitochondrial precursor |
| spt Q04447     | Creatine kinase, B chain                                    |
| trm Q6PEM2     | Pzp protein                                                 |
| rf XP_484375.1 | similar to Myosin light polypeptide 6                       |
| rf XP_289920.3 | similar to Filamin A                                        |
| spt P63254     | Cysteine-rich protein 1                                     |
| trm Q91XL1     | Leucine-rich alpha-2-glycoprotein precursor                 |
| spt Q9JJU8     | SH3 domain-binding glutamic acid-rich-like protein          |
| trm Q91X28     | Carbonyl reductase 1                                        |
| trm Q5RJ13     | Glucose phosphate isomerase 1                               |
| spt P19096     | Fatty acid synthase                                         |
| spt Q9CQ60     | 6-phosphogluconolactonase                                   |
| spt P24527     | Leukotriene A-4 hydrolase                                   |
| spt Q6IRU2     | Tropomyosin alpha 4 chain                                   |
| spt O54962     | Barrier-to-autointegration factor                           |
| trm Q8K1X5     | EH-domain containing 1                                      |
| cra mCP34748   | NRAA Best Hit: Sumo                                         |
| spt P07356     | Annexin A2                                                  |
| spt P23953     | Liver carboxylesterase N precursor                          |
| spt P99027     | 60S acidic ribosomal protein P2                             |
| spt P40124     | Adenylyl cyclase-associated protein 1                       |
| spt P18760     | Cofilin, non-muscle isoform                                 |
| spt P61089     | Ubiquitin-conjugating enzyme E2 N                           |
| spt O08997     | Copper transport protein ATOX1                              |
| trm Q91VL7     | EH domain containing protein MPAST2                         |
| trm Q80XE6     | Murinoglobulin 1                                            |
| trm Q7TMN7     | Annexin A4                                                  |
| spt P63101     | 14-3-3 protein zeta/delta                                   |
| trm Q9CQL3     | Mus musculus adult male testis cDNA,                        |
| spt P32261     | Antithrombin-III precursor                                  |
| spt P68373     | Tubulin alpha-6 chain                                       |
| spt P16858     | Glyceraldehyde-3-phosphate dehydrogenase                    |
| trm Q9ESS7     | S-gicerin/MUC18                                             |
| trm Q9Z2X1     | Heterogeneous nuclear ribonucleoprotein F                   |
| spt Q9CQV8     | 14-3-3 protein beta/alpha                                   |
| rf XP_486306.1 | similar to ribosomal protein S19                            |
| spt P26645     | Myristoylated alanine-rich C-kinase substrate               |
| rf NP_033991.1 | cell division cycle 42 homolog                              |
| trm Q920I4     | Carnitine deficiency-associated protein CDV3A               |
| trm Q66JR6     | Hypothetical protein                                        |

|                |                                                 |
|----------------|-------------------------------------------------|
| trm Q9DC41     | Mus musculus adult male lung cDNA,              |
| trm Q8BH85     | Homologue of the porcine 135kDa a-D-mannosidase |
| spt P62962     | Profilin-1                                      |
| trm Q6P912     | Clic3 protein                                   |
| spt P10126     | Elongation factor 1-alpha 1                     |
| spt Q9DCT8     | Cysteine-rich protein 2                         |
| trm Q6PAC1     | Gsn protein                                     |
| trm Q7TPD4     | Microtubule-associated protein 4                |
| spt P45878     | FK506-binding protein 2 precursor               |
| spt Q61792     | LIM and SH3 domain protein 1                    |
| spt P08207     | Calpactin I light chain                         |
| trm Q8BNM0     | Mus musculus 7 days embryo whole body cDNA,     |
| spt Q99JY9     | Actin-like protein 3                            |
| trm Q99K20     | Ldh1 protein                                    |
| trm Q71LX8     | Heat shock protein 84b                          |
| trm Q8R2X0     | Ehd2 protein                                    |
| spt P21107     | Tropomyosin alpha 3 chain                       |
| trm Q7TQJ7     | Sec31l1 protein                                 |
| trm Q6PI18     | Valosin containing protein                      |
| spt P68037     | Ubiquitin-conjugating enzyme E2 L3              |
| gb AAC52641.1  | SH3P2                                           |
| trm Q91YT9     | Pgd protein                                     |
| trm Q91VI7     | Ribonuclease/angiogenin inhibitor 1             |
| spt Q61598     | Rab GDP dissociation inhibitor beta-2           |
| spt P99029     | Peroxiredoxin 5, mitochondrial precursor        |
| rf NP_035229.2 | pyruvate kinase 3                               |
| trm Q811C8     | Igfbp7 protein                                  |
| spt P68368     | Tubulin alpha-4 chain                           |
| trm Q9D7V0     | Mus musculus adult male stomach cDNA,           |
